# Supplementary material
Source: publisher figshare collection journal article supplement (https://sage.figshare.com/ndownloader/files/13124705)
Supplement: Supplementary file 1 [file 13124705]

Supplemental Tables

**"The profile of music as a creative domain in people’s conceptions. Expanding Runco & Bahleda’s 1986 study on implicit theories of creativity in a conceptual replication."**

Table S1. Summary of the correspondence analysisa

| Dimension | Singular Value | Inertia | Chi Square | Sig. | Proportion of Inertia | | Confidence Singular Value | |
| --- | --- | --- | --- | --- | --- | --- | --- | --- |
| accounted for | cumulative | Standard Deviation | Correlation |
| 2 |
| 1 | .522 | .273 |  |  | .450 | .450 | .027 | .119 |
| 2 | .452 | .204 |  |  | .336 | .786 | .029 |  |
| 3 | .360 | .130 |  |  | .214 | 1.000 |  |  |
| Total |  | .606 | 416.035 | .000a | 1.000 | 1.000 |  |  |
| *Note.* a 78 degrees of freedom. | | | | | | | | |

Table S2. Overview of row pointsa

| Domains | Mass | Score in Dimension | | Inertia | Contribution | | | | |
| --- | --- | --- | --- | --- | --- | --- | --- | --- | --- |
| 1 | 2 | of Point to Inertia of Dimension | | of Dimension to Inertia of Point | | |
| 1 | 2 | 1 | 2 | Total |
| ART | .286 | .588 | .390 | .160 | .362 | .213 | .617 | .271 | .888 |
| SCIENCE | .187 | -.348 | -.637 | .145 | .083 | .371 | .156 | .522 | .678 |
| EVERYDAY | .232 | -.759 | .467 | .188 | .489 | .248 | .710 | .268 | .978 |
| MUSIC | .296 | .246 | -.340 | .113 | .066 | .168 | .158 | .303 | .461 |
| Total | 1.000 |  |  | .606 | 1.000 | 1.000 |  |  |  |
| *Note.* a Row principal normalisation. | | | | | | | | | |

Table S3. Overview of column pointsa

| Meta-category | Mass | Score in Dimension | | Inertia | Contribution | | | | |
| --- | --- | --- | --- | --- | --- | --- | --- | --- | --- |
| 1 | 2 | of Point to Inertia of Dimension | | of Dimension to Inertia of Point | | |
| 1 | 2 | 1 | 2 | Total |
| activating | .019 | .347 | 1.202 | .006 | .002 | .027 | .098 | .881 | .980 |
| arranging | .079 | .555 | .016 | .008 | .024 | .000 | .799 | .000 | .800 |
| beautiful | .009 | 1.333 | 1.975 | .014 | .016 | .034 | .313 | .513 | .826 |
| communicative | .010 | -1.120 | .123 | .004 | .013 | .000 | .924 | .008 | .932 |
| courageous | .019 | -.374 | -.124 | .002 | .003 | .000 | .323 | .027 | .350 |
| curious | .012 | -1.463 | -2.447 | .037 | .025 | .070 | .184 | .385 | .569 |
| emotional | .042 | .598 | -.546 | .014 | .015 | .013 | .290 | .181 | .471 |
| exceptional | .022 | 1.509 | .383 | .014 | .050 | .003 | .942 | .045 | .988 |
| experimenting | .026 | -.234 | -1.715 | .018 | .001 | .077 | .022 | .866 | .888 |
| expressive | .032 | 1.818 | 1.604 | .053 | .106 | .083 | .547 | .318 | .866 |
| fascinating | .017 | 1.034 | -.895 | .013 | .019 | .014 | .384 | .216 | .600 |
| flexible | .067 | -1.045 | .957 | .052 | .073 | .061 | .382 | .240 | .622 |
| gifted | .006 | 1.843 | 1.017 | .007 | .020 | .006 | .785 | .179 | .963 |
| imaginative | .101 | .200 | .437 | .028 | .004 | .019 | .039 | .138 | .177 |
| innovative | .108 | .496 | -.629 | .023 | .027 | .043 | .309 | .372 | .681 |
| open-minded | .055 | .123 | .294 | .005 | .001 | .005 | .049 | .210 | .259 |
| organised | .028 | .201 | -1.656 | .021 | .001 | .076 | .015 | .754 | .769 |
| original | .029 | 1.173 | .067 | .012 | .040 | .000 | .899 | .002 | .902 |
| perceptive | .015 | -.439 | 1.743 | .010 | .003 | .044 | .078 | .921 | .999 |
| problem-solving | .057 | -1.992 | -.311 | .073 | .226 | .005 | .847 | .015 | .862 |
| spontaneous | .023 | -.470 | 1.653 | .015 | .005 | .064 | .097 | .893 | .990 |
| successful | .017 | -1.324 | .817 | .013 | .031 | .012 | .646 | .184 | .829 |
| thorough | .051 | -1.319 | .803 | .031 | .089 | .033 | .773 | .214 | .987 |
| unconventional | .079 | -.137 | -1.804 | .053 | .001 | .256 | .008 | .987 | .994 |
| unexpected | .029 | .244 | -.413 | .014 | .002 | .005 | .034 | .072 | .106 |
| unique | .031 | 1.738 | .718 | .029 | .092 | .016 | .885 | .113 | .998 |
| useful | .017 | -2.531 | 1.387 | .038 | .112 | .034 | .815 | .183 | .997 |
| Total | 1.000 |  |  | .606 | 1.000 | 1.000 |  |  |  |
| *Note.* a Row principal normalisation. | | | | | | | | | | |
